# Supplementary material
Source: publisher figshare collection journal article supplement (https://gsapubs.figshare.com/ndownloader/files/22495256)
Supplement: Supplementary file 1 [file 22495256]

## Sheet: Supp Tbl Page 1
Supplemental Table 1: Geochemical Data
	Great Basin
SAMPLE	04-LT-48	04-LT-51	04-LT-41	11-CN-08	11-CN-09	04-LT-08	04-LT-05	04-LT-02	04-LT-06	04-LT-10	04-LT-09
LOCATION	Bell Canyon	Bell Canyon	Stillwater Mtns	Stillwater Mtns	Stillwater Mtns	Truckee Rg	Truckee Rg	Truckee Rg	Truckee Rg	Hot Springs Mtns	Hot Springs Mtns
Latitude	39.1443	39.1693	39.3945	39.274	39.5076	39.73	39.7256	39.7246	39.7262	39.7678	39.7678
Longitude	-118.169	-118.226	-118.304	-118.403	-118.408	-119.276	-119.283	-119.283	-119.284	-118.983	-118.983
SiO2	53.32	50.4	53.37	48.15	49.19	53.56	52.98	52.82	55.32	53.2	53.79
TiO2	0.832	1.512	1.2	1.75	1.459	1.33	1.191	1.344	1.043	1.424	1.406
Al2O3	16.16	17.33	16.89	16.48	15.9	17	17.81	17.2	17.1	16.85	16.84
Fe2O3t	5.091	10.4	8.839	10.989	9.773	8.913	9.061	9.291	8.072	8.585	8.968
MnO	0.094	0.15	0.159	0.163	0.172	0.142	0.149	0.143	0.134	0.112	0.136
MgO	1.98	4.43	4.17	5.34	6.59	4.27	4.36	4.53	3.95	4.06	4.21
CaO	5.39	8.72	7.66	9.73	7.98	7.19	7.46	7.55	6.76	6.97	6.85
Na2O	4.43	3.53	3.44	3.01	3.21	3.78	3.77	3.68	3.76	3.97	3.94
K2O	2.583	1.334	1.637	1.138	1.418	1.87	1.756	1.699	2.108	2.023	2.069
P2O5	0.27	0.6	0.45	0.597	0.632	0.55	0.62	0.54	0.5	0.62	0.63
LOI	1.3	1.5	2	1.99	2.88	0.9	0.8	0.4	0.5	1.8	0.9
Total+LOI	91.45	99.906	99.815	99.337	99.204	99.505	99.957	99.197	99.247	99.614	99.739
V	103	247	196	264.26	212.56	184	187	192	157	177	164
Cr	10	68	52	135	211	66	52	72	55	46	49
Co	13	28	26	34.9	35.5	35	28	33	22	27	24
Ni	7	35	64	47	122	112	90	240	75	60	59
Zn	74	115	98	106.51	104.12	110	113	111	103	119	119
Ba	1066	1143	757	762.8	870.3	972	1069	911	1077	1105	1118
La	28.24	29.97	23.03	24.95	30.74	30.55	34.15	28.63	34.24	41.32	42.13
Ce	57.96	64.79	50.7	56.38	67.31	65.9	74.68	62.05	72.87	88.79	90.53
Pr	6.9	9.017	6.558	7.78	8.94	8.42	9.482	8.013	9.242	11.286	11.388
Nd	27.15	38.12	28.17	33.88	37.81	34.52	39.06	34.03	37.27	45.74	46.66
Sm	5.09	7.96	5.69	7.39	7.81	6.95	7.68	6.84	7.22	8.9	8.99
Eu	1.359	2.07	1.549	2.14	2.07	1.812	2.005	1.837	1.826	2.112	2.13
Gd	4.431	7.027	5.098	6.71	6.87	6.038	6.337	5.922	5.93	7.553	7.594
Tb	0.644	1.008	0.724	0.97	0.964	0.851	0.875	0.829	0.833	1.078	1.088
Dy	3.774	5.763	4.104	5.79	5.66	4.8	4.986	4.825	4.717	6.183	6.31
Ho	0.756	1.14	0.802	1.15	1.1	0.933	0.953	0.922	0.911	1.213	1.223
Er	2.179	3.144	2.264	3.16	3.05	2.655	2.75	2.654	2.608	3.46	3.478
Tm	0.324	0.445	0.32	0.447	0.433	0.385	0.386	0.371	0.372	0.494	0.498
Yb	2.12	2.9	2.06	2.861	2.752	2.46	2.52	2.41	2.42	3.22	3.25
Lu	0.325	0.433	0.305	0.43	0.42	0.372	0.381	0.36	0.365	0.488	0.497
Rb	67.46	21.2	36.29	19.79	23	33.6	25.64	29.33	39.58	26.11	36.18
Sr	615.2	911	694.9	671	670	734.2	820.2	734.3	747.6	733	706.9
Nb	12.2	11.7	8.1	15.51	12.86	13.5	11.9	12.8	10.7	21.9	22.1
Cs	2.325	0.607	1.07	0.36	0.49	0.372	0.669	0.679	0.915	1.009	0.828
Hf	5.4	4.5	3.5	3.85	4.59	5.1	5.4	4.9	5.6	7.3	7.4
Ta	0.74	0.57	0.43	0.9	0.7	0.68	0.57	0.65	0.52	1.04	1.05
Th	7.06	3.42	3.06	1.78	2.75	2.35	2.97	2.24	3.2	3	3.13
U	2.856	1.777	1.055	0.94	1.04	0.908	1.036	0.966	1.257	1.156	1.246
Y	21.07	30.25	21.98	30.68	29.85	26.45	26.81	25.76	26.27	33.2	33.67
Zr	223.3	189.5	140.3	160	195	227.2	238.7	214.2	254.1	335.8	340.9
Sc	12.87	26.43	20.74	33.9	26.2	19.82	18.7	20.86	18.56	18.61	17.82
Pb	14.9	9.5	9.8	5	8.1	11.1	10.7	10.4	12.9	11.4	11.1
(87Sr/86Sr)i	0.704607	0.704711	0.705295	0.70504	0.704518	0.704834	0.704686	0.704773	0.704476	0.7047	0.704694
(143Nd/144Nd)i	0.512697	0.51266	0.512715	0.512563	0.512684	0.512638	0.512695	0.51265	0.512642	0.512644	0.512649
(208Pb/204Pb)i	38.7635	38.6903	38.3757	38.488	38.4377	38.4625	38.4284	38.4226	38.4255	38.452	38.472
(207Pb/204Pb)i	15.6634	15.6393	15.5493	15.5777	15.5635	15.5735	15.5694	15.5628	15.5699	15.569	15.576
(206Pb/204Pb)i	18.9792	18.9716	18.8808	18.9196	18.9247	18.9047	18.8758	18.8832	18.8749	18.913	18.915
											continued...

## Sheet: Supp Tbl Page 2
Supplemental Table 1: Geochemical Data
	Eastern Ancestral Cascade Arc				Western Ancestral Cascade Arc									Precision (% Average
SAMPLE	04-LT-32	04-LT-31	04-LT-25	04-LT-24	04-LT-01	04-LT-87	04-LT-83	04-LT-102	04-LT-21	04-LT-103	Towle #2	Towle #1	04-LT-68a	Difference, except
LOCATION	Sparks	Sparks	Lousetown	Lousetown	Ladybud	Portola	Portola	Pond Terrace	Andesite Ridge	Devils Peak	Lowell Ridge	Sawtooth	Henness Pass	isotope ratios that
														are 2-sigma standard
Latitude	39.5787	39.5583	39.3935	39.3942	39.4858	39.7698	39.6863	39.2188	39.3425	39.281	39.25	39.2	39.5058	deviations)
Longitude	-119.701	-119.703	-119.607	-119.609	-120.047	-120.463	-120.495	-120.329	-120.351	-120.444	-120.792	-120.667	-120.829
SiO2	53.13	52.65	52.74	52.06	52.86	52.56	49.28	54.14	52.75	51.26	52.26	48.93	51.32	0.5
TiO2	0.93	0.746	0.951	0.798	0.735	0.705	0.656	0.67	0.777	0.672	0.782	0.656	0.773	1.9
Al2O3	16.87	16.35	18.31	17.99	17.02	16.33	14.97	13.47	16.74	14.34	16.76	15.19	17.81	1.2
Fe2O3t	8.886	8.808	8.703	8.655	8.401	8.38	9.623	8.966	8.822	9.039	8.067	9.468	9.969	1.6
MnO	0.146	0.164	0.146	0.146	0.137	0.142	0.154	0.156	0.151	0.144	0.132	0.156	0.175	3.4
MgO	6.26	6.92	4.29	5.64	7.48	8.24	12.08	7.62	6.03	10.61	6.92	11.97	6.24	1.7
CaO	8.27	9.33	8.78	9.91	8.64	8.62	9.28	10.35	9.6	9.83	9.08	10.04	8.55	1.9
Na2O	3.52	3.05	3.47	3.16	3.17	3.21	2.33	2.27	2.55	2.35	2.4	2.22	2.81	2.7
K2O	1.044	0.794	1.157	1.012	0.798	0.708	0.908	1.087	1.325	0.927	1.279	0.511	1.002	6.5
P2O5	0.23	0.16	0.32	0.18	0.17	0.19	0.15	0.17	0.14	0.17	0.23	0.15	0.32	5
LOI	0.2	0	0.9	0.1	0.4	1.2	0.3	1.6	1	0.7	1.1	0	0.4	5
Total+LOI	99.486	98.972	99.767	99.651	99.811	100.285	99.731	100.499	99.885	100.042	99.01	99.291	99.369
V	188	216	172	234	195	177	197	232	268	194	213	226	184	4
Cr	186	236	26	109	314	452	862	312	95	620	222	983	188	6.4
Co	36	32	29	31	37	40	51	32	37	37	27	48	31	16
Ni	90	89	34	39	172	154	325	56	61	186	57	292	122	16.7
Zn	95	89	107	83	85	86	79	82	85	84	85	80	96	3.1
Ba	634	421	691	468	447	405	537	500	538	337	316	254	589	7.5
La	13.38	9.53	29.93	14.67	9.94	9.15	13.26	14.85	12.55	11.75	17.68	8.09	20.65	3.3
Ce	28.7	20.59	62.41	29.66	21.34	19.92	23.47	31.12	26.87	24.76	36.13	17.67	39.33	3.4
Pr	3.844	2.745	7.872	3.887	2.93	2.716	3.265	4.112	3.566	3.461	5.197	2.479	5.422	3.8
Nd	16.77	11.94	31.78	16.62	12.9	12.22	13.69	17.37	15.26	14.71	22.24	10.8	22.41	3.1
Sm	3.72	2.85	6	3.6	2.93	2.69	2.94	3.58	3.53	3.2	4.39	2.47	4.62	2.7
Eu	1.159	0.906	1.764	1.119	0.923	0.868	0.899	1.008	1.02	0.958	1.282	0.828	1.465	7.3
Gd	3.424	2.962	4.696	3.353	2.809	2.673	3.031	3.045	3.28	2.999	3.939	2.747	4.339	7.3
Tb	0.514	0.471	0.621	0.491	0.44	0.409	0.465	0.425	0.497	0.443	0.576	0.45	0.608	6.5
Dy	3.078	2.9	3.541	2.933	2.665	2.468	2.838	2.462	2.981	2.729	3.183	2.727	3.459	4.3
Ho	0.608	0.606	0.671	0.586	0.542	0.511	0.633	0.48	0.615	0.566	0.661	0.626	0.675	3
Er	1.721	1.769	1.888	1.693	1.55	1.496	1.845	1.383	1.803	1.586	1.792	1.749	1.932	4.7
Tm	0.241	0.259	0.264	0.241	0.222	0.219	0.266	0.194	0.259	0.229	0.272	0.27	0.266	6.5
Yb	1.56	1.71	1.7	1.63	1.47	1.42	1.72	1.3	1.7	1.54	1.67	1.7	1.77	4.5
Lu	0.235	0.259	0.252	0.239	0.224	0.212	0.26	0.196	0.254	0.233	0.254	0.265	0.271	5.3
Rb	17.12	10.03	14.09	12.58	12.06	14.01	16.52	14.99	27.25	12.36	14.66	10.99	21.38	3.5
Sr	732	500	1436	719	640.2	652.4	479.1	792.8	575.8	749.9	910.6	425.3	628	2.2
Nb	4.5	2.6	3.2	2.5	3	2.5	2.6	2.6	2.8	2.8	3.9	2.9	4.6	8.1
Cs	0.461	0.167	0.223	0.369	0.69	0.709	0.924	0.762	1.221	0.267	0.463	0.268	0.538	9
Hf	2.5	1.9	2.6	2.1	2.1	1.9	2	1.9	2.4	2	2.6	1.6	2.6	7.5
Ta	0.24	0.135	0.18	N.D.	0.17	0.17	0.18	0.15	0.17	0.15	0.27	0.24	0.25	14.6
Th	2.09	1.09	6.55	4.09	1.69	0.94	3.39	3.34	3.24	2.14	2.94	1.23	3.38	7.1
U	0.775	0.425	2.072	1.255	0.711	0.459	1.534	1.166	1.538	0.673	0.859	0.386	0.973	6.1
Y	16.32	16.41	18.74	16.06	14.99	14.3	19.55	12.91	16.56	15.12	17.5	15.23	19.46	6.3
Zr	95.9	71.9	92	75.5	76.9	67.8	74.3	70.6	86.6	76	96.4	59	99.2	3.5
Sc	23.88	34.21	18.17	31.39	28.01	27.28	34.16	34.89	38.04	32.83	37.72	40.72	21.25	3.5
Pb	8.7	5.9	16.6	5.9	8.4	6.6	11.9	7.1	7.6	3.7	5.5	3.6	5.5	1
(87Sr/86Sr)i	0.704591	0.704332	0.70453	0.704139	0.704719	0.704573	0.704913	0.703939	0.704727	0.704063	0.704264	0.706101	0.704629	1.8e-05
(143Nd/144Nd)i	0.512709	0.512761	0.512744	0.512771	0.512685	0.51271	0.512707	0.512674	0.512729	0.512595	0.512538	0.512418	0.51264	0.043
(208Pb/204Pb)i	38.6611	38.6749	38.3223	38.3229	38.4642	38.6183	38.8006	38.7356	38.4512	38.8648	38.3015	38.7257	38.6973	0.013
(207Pb/204Pb)i	15.6406	15.6517	15.5326	15.5363	15.5726	15.6197	15.6454	15.6474	15.5665	15.6843	15.6257	15.687	15.6187	0.01
(206Pb/204Pb)i	18.9491	18.8938	18.8817	18.8511	18.9093	18.9321	19.0501	18.9519	18.9064	19.0004	18.933	19.1249	19.0162	0.05
Note: Major-element oxides (wt%) and trace elements V through Ba (ppm) were analyzed by X-ray fluorescence; La through Pb (ppm) were analyzed by acid-dissolution–inductively coupled plasma–mass spectrometry. Fe2O3t—total iron expressed as Fe2O3; LOI—loss on ignition; Precisions are based on repeat analyses of duplicate rocks over 5 yr time period.
